# Supplementary material for: Investigating Host Preference of Root Endophytes of Three European Tree Species, with a Focus on Members of the Phialocephala fortinii—Acephala applanata Species Complex (PAC)
Source: MDPI journal article supplement (doi:10.3390/jof7040317), 2021-04-19
Supplement: s1 [file s1]

# Supplementary Materials: Investigating Host Preference of Root Endophytes of Three European Tree Species, with a Focus on Members of the *Phialocephala fortinii*—*Acephala applanata* Species Complex (PAC)

**Table S1.** Strains of which the DNA ITS region was sequenced, with closest matching sequence in GenBank and GenBank accession numbers of the new sequence.

| Strain     | Host                       | Species <sup>1</sup>           | GenBank Accession Number | Minimum Identity | Maximum Identity | Best Match in GenBank |
|------------|----------------------------|--------------------------------|--------------------------|------------------|------------------|-----------------------|
| P16Es2_1   | <i>Fraxinus excelsior</i>  | <i>Agrocybe erebia</i>         | MT107606                 | 96               | 99.8             | MK573902              |
| P7Ah1_6    | <i>Acer pseudoplatanus</i> | <i>Cadophora orchidicola</i>   | MT107574                 | 99.5             | 99.6             | KY322649              |
| P7Ah3_1    | <i>Acer pseudoplatanus</i> | <i>Cadophora orchidicola</i>   | MT107569                 | 99.1             | 99.6             | KR230081              |
| P8Ah1_1    | <i>Acer pseudoplatanus</i> | <i>Cadophora orchidicola</i>   | MT107570                 | 99.5             | 99.6             | AF486133              |
| P9Ah4_7    | <i>Acer pseudoplatanus</i> | <i>Cadophora orchidicola</i>   | MT107578                 | 99.3             | 99.6             | KY322649              |
| P17Es4_1   | <i>Fraxinus excelsior</i>  | <i>Cadophora orchidicola</i>   | MT107609                 | 99.5             | 99.5             | KF646097              |
| P18Es5_6-1 | <i>Fraxinus excelsior</i>  | <i>Cadophora orchidicola</i>   | MT107616                 | 99.3             | 100              | AF486133              |
| P18Es5_6-2 | <i>Fraxinus excelsior</i>  | <i>Cadophora orchidicola</i>   | MT107623                 | 99.3             | 100              | AF486133              |
| P2Es1_4    | <i>Fraxinus excelsior</i>  | <i>Cadophora orchidicola</i>   | MT107608                 | 98.8             | 98.8             | KF646097              |
| P3Es3_2    | <i>Fraxinus excelsior</i>  | <i>Cadophora orchidicola</i>   | MT107621                 | 98.7             | 98.7             | KF646097              |
| P6Es5_7    | <i>Fraxinus excelsior</i>  | <i>Cadophora orchidicola</i>   | MT107602                 | 98.5             | 99.3             | KY271867              |
| P10Ah4_2   | <i>Acer pseudoplatanus</i> | <i>Cadophora</i> sp.           | MT107615                 | 97.5             | 98.8             | JN859254              |
| P11Ah5_6   | <i>Acer pseudoplatanus</i> | <i>Cadophora</i> sp.           | MT107622                 | 97               | 98.7             | JN859254              |
| P17Ah5_1   | <i>Acer pseudoplatanus</i> | <i>Cadophora</i> sp.           | MT107588                 | 97.3             | 98.6             | JN859254              |
| P9Ah3_6    | <i>Acer pseudoplatanus</i> | <i>Cadophora</i> sp.           | MT107601                 | 97.5             | 98.8             | JN859254              |
| P2Es5_2    | <i>Fraxinus excelsior</i>  | <i>Cadophora</i> sp.           | MT107614                 | 97.5             | 100              | JN859244              |
| P16Ah4_2   | <i>Acer pseudoplatanus</i> | <i>Cylindrocarpon</i> sp.      | MT107581                 | 99.4             | 100              | KM248576              |
| P13Ah2_2   | <i>Acer pseudoplatanus</i> | <i>Ilyonectria destructans</i> | MT107604                 | 99.8             | 100              | MN540280              |
| P18Ah5_2   | <i>Acer pseudoplatanus</i> | <i>Ilyonectria destructans</i> | MT107611                 | 100              | 100              | MN540280              |
| P2Ah4_1    | <i>Acer pseudoplatanus</i> | <i>Ilyonectria destructans</i> | MT107624                 | 100              | 100              | MN540280              |
| P3Ah1_2    | <i>Acer pseudoplatanus</i> | <i>Ilyonectria destructans</i> | MT107617                 | 99.8             | 100              | MN540280              |
| P14Es3_2   | <i>Fraxinus excelsior</i>  | <i>Ilyonectria destructans</i> | MT107625                 | 99.8             | 99.8             | MN540280              |
| P7Es5_1    | <i>Fraxinus excelsior</i>  | <i>Ilyonectria destructans</i> | MT107594                 | 100              | 100              | MN540280              |

|           |                            |                                |          |      |      |           |
|-----------|----------------------------|--------------------------------|----------|------|------|-----------|
| P12Fi3_2  | <i>Picea abies</i>         | <i>Ilyonectria destructans</i> | MT107595 | 99.8 | 99.8 | MN540280  |
| P5Fi3_1   | <i>Picea abies</i>         | <i>Ilyonectria destructans</i> | MT107580 | 99.8 | 99.8 | MN540280  |
| P8Fi3_1   | <i>Picea abies</i>         | <i>Ilyonectria destructans</i> | MT107589 | 100  | 100  | MN540280  |
| P8Es3_2   | <i>Fraxinus excelsior</i>  | <i>Ilyonectria</i> sp.         | MT107603 | 100  | 100  | MN385473  |
| P3Fi2_2-1 | <i>Picea abies</i>         | <i>Mollisia</i> sp.            | MT107629 | 99.2 | 99.8 | JN225881  |
| P11Ah1_2  | <i>Acer pseudoplatanus</i> | <i>Neonectria</i> sp.          | MT107590 | 100  | 100  | KF428615  |
| P12Ah5_1  | <i>Acer pseudoplatanus</i> | <i>Neonectria</i> sp.          | MT107596 | 99.3 | 99.6 | KF428615  |
| P14Es5_1  | <i>Fraxinus excelsior</i>  | <i>Neonectria</i> sp.          | MT107618 | 100  | 100  | KF428615  |
| P18Es2_1  | <i>Fraxinus excelsior</i>  | <i>Neonectria</i> sp.          | MT107610 | 99.8 | 99.8 | KF428615  |
| P8Ah1_2   | <i>Acer pseudoplatanus</i> | <i>Pezicula ericae</i>         | MT107587 | 99   | 100  | KU516539  |
| P8Es2_1   | <i>Fraxinus excelsior</i>  | <i>Pezicula ericae</i>         | MT107627 | 98.5 | 99.2 | KU516539  |
| P16Ah1_1  | <i>Acer pseudoplatanus</i> | <i>Pezicula melanigena</i>     | MT107586 | 99.2 | 100  | KU516542  |
| P2Ah2_2   | <i>Acer pseudoplatanus</i> | <i>Pezicula melanigena</i>     | MT107612 | 98.8 | 100  | LC206663  |
| P17Es2_2  | <i>Fraxinus excelsior</i>  | <i>Pezicula melanigena</i>     | MT107620 | 98.1 | 100  | LC206663  |
| P4Es5_1   | <i>Fraxinus excelsior</i>  | <i>Pezicula melanigena</i>     | MT107584 | 98.5 | 99.4 | NR_155611 |
| P10Fi3_2b | <i>Picea abies</i>         | <i>Pezicula melanigena</i>     | MT107600 | 98.9 | 99.8 | KU516542  |
| P11Fi2_1  | <i>Picea abies</i>         | <i>Pezicula melanigena</i>     | MT107579 | 98.9 | 99.8 | KU516542  |
| P12Fi5_1  | <i>Picea abies</i>         | <i>Pezicula melanigena</i>     | MT107585 | 98.8 | 100  | LC206663  |
| P7Fi3_1   | <i>Picea abies</i>         | <i>Pezicula melanigena</i>     | MT107598 | 99.2 | 100  | KU516542  |
| P10Es1_1  | <i>Fraxinus excelsior</i>  | <i>Pezicula radiculicola</i>   | MT107607 | 99.6 | 100  | NR_155610 |
| P14Es1_2  | <i>Fraxinus excelsior</i>  | <i>Pezicula radiculicola</i>   | MT107613 | 99.6 | 100  | NR_155610 |
| P2Es1_2   | <i>Fraxinus excelsior</i>  | <i>Pezicula radiculicola</i>   | MT107599 | 100  | 100  | NR_155610 |
| P3Fi5_2   | <i>Picea abies</i>         | <i>Pezicula radiculicola</i>   | MT107583 | 99.6 | 100  | NR_155610 |
| P6Es4_1   | <i>Fraxinus excelsior</i>  | <i>Phoma eupyrena</i>          | MT107628 | 99.6 | 99.6 | AJ890436  |
| P2Ah3_6   | <i>Acer pseudoplatanus</i> | <i>Phoma</i> sp.               | MT107571 | 98.7 | 98.9 | MF948641  |
| P4Ah5_2   | <i>Acer pseudoplatanus</i> | <i>Phoma</i> sp.               | MT107572 | 98.8 | 99   | MF948641  |
| P5Ah3_1   | <i>Acer pseudoplatanus</i> | <i>Phoma</i> sp.               | MT107575 | 99.2 | 99.4 | MF948641  |
| P2Es4_1   | <i>Fraxinus excelsior</i>  | <i>Phoma</i> sp.               | MT107565 | 98.7 | 98.9 | MF948641  |
| P2Es4_6   | <i>Fraxinus excelsior</i>  | <i>Phoma</i> sp.               | MT107576 | 98.6 | 98.8 | MF948641  |
| P2Es4_7   | <i>Fraxinus excelsior</i>  | <i>Phoma</i> sp.               | MT107577 | 98.8 | 99   | MF948641  |
| P4Es1_6   | <i>Fraxinus excelsior</i>  | <i>Phoma</i> sp.               | MT107566 | 99.2 | 99.4 | MF948641  |
| P4Es4_1   | <i>Fraxinus excelsior</i>  | <i>Phoma</i> sp.               | MT107562 | 99   | 99.2 | MF948641  |
| P4Es4_7   | <i>Fraxinus excelsior</i>  | <i>Phoma</i> sp.               | MT107563 | 99   | 99.2 | MF948641  |
| P5Es2_6   | <i>Fraxinus excelsior</i>  | <i>Phoma</i> sp.               | MT107564 | 99   | 99.2 | MF948641  |
| P3Fi1_1   | <i>Picea abies</i>         | <i>Phoma</i> sp.               | MT107573 | 99   | 99.2 | MF948641  |
| P10Fi1_2  | <i>Picea abies</i>         | <i>Phomopsis phaseoli</i>      | MT107630 | 96.2 | 98.3 | EU272538  |
| P10Fi2_2  | <i>Picea abies</i>         | <i>Phomopsis phaseoli</i>      | MT107582 | 96   | 98.2 | EU272538  |
| P14Fi2_1  | <i>Picea abies</i>         | <i>Phomopsis phaseoli</i>      | MT107592 | 96.1 | 98.4 | EU272538  |
| P2Fi1_2   | <i>Picea abies</i>         | <i>Phomopsis phaseoli</i>      | MT107626 | 96.1 | 98.3 | EU272538  |
| P2Fi4_1   | <i>Picea abies</i>         | <i>Phomopsis phaseoli</i>      | MT107619 | 96.1 | 98.4 | EU272538  |

|         |                           |                                   |          |      |      |          |
|---------|---------------------------|-----------------------------------|----------|------|------|----------|
| P3Fi5_1 | <i>Picea abies</i>        | <i>Phomopsis phaseoli</i>         | MT107591 | 99.1 | 99.6 | AF001018 |
| P6Fi3_1 | <i>Picea abies</i>        | <i>Phomopsis phaseoli</i>         | MT107605 | 96.2 | 98.3 | EU272538 |
| P6Fi4_1 | <i>Picea abies</i>        | <i>Phomopsis phaseoli</i>         | MT107597 | 96.2 | 98.5 | EU272538 |
| P5Es5_6 | <i>Fraxinus excelsior</i> | <i>Rhexocercosporidium</i><br>sp. | MT107567 | 98   | 99.2 | MN124205 |
| P5Es5_7 | <i>Fraxinus excelsior</i> | <i>Rhexocercosporidium</i><br>sp. | MT107568 | 98.2 | 100  | MN124203 |

<sup>1</sup> Species names according to Index Fungorum (<http://www.indexfungorum.org/Names/Names.asp>) (accessed on February 26, 2020).
